# Supplementary material for: Patient-Led, Technology-Assisted Malnutrition Risk Screening in Hospital: A Feasibility Study
Source: MDPI journal article supplement (doi:10.3390/nu16081139), 2024-04-12
Supplement: s1 [file s1]

## Supplementary File S2: Patient satisfaction survey Patient semi-structured interview guide

Preamble: “Thanks for taking the time to talk with me today. In this interview, I am going to ask you a few questions about your experiences with completing the MST via your bedside computer. There are no right or wrong answers; we just want your honest opinions and feedback. Before we start, do you have any questions about the interview?”

| Domain                              | Example questions                                                                                                                                                                                                                                                                                                     | Example prompts                                                                                                                                                                                                             |
|-------------------------------------|-----------------------------------------------------------------------------------------------------------------------------------------------------------------------------------------------------------------------------------------------------------------------------------------------------------------------|-----------------------------------------------------------------------------------------------------------------------------------------------------------------------------------------------------------------------------|
| Affective attitude / Experience     | Overall, what did you think about the electronic MST?<br>How was the process for you, overall?<br>Were there any aspects you didn't like?                                                                                                                                                                             | How easy/difficult was it to navigate to from the home page?<br><br>What was the wording / instructions like? Were they easy or difficult to understand?<br><br>Was the layout / presentation suitable? Was it easy to see? |
| Intention                           | How confident were you in completing the electronic MST?<br><br>Would you complete this in the future (i.e. if you are admitted to hospital again) if asked to by your doctor, dietitian or nurse?<br><br>Do you see any barriers to asking patients (or their family members) to complete the MST while in hospital? | Was there anything that could have made you more confident / helped you to complete MST?<br><br>Why/why not?<br><br>Is there anything that could help overcome these barriers?                                              |
| Coherence / Perceived effectiveness | Did you understand the purpose of the MST?<br><br>Do you think the information you provided in the MST will be useful for your health care team here in hospital?                                                                                                                                                     | Was there anything you would have liked more information on?<br><br>Why/why not?                                                                                                                                            |
| Burden / Opportunity costs          | How much effort or burden was it to complete the electronic MST?                                                                                                                                                                                                                                                      | Did participating in this study impact your day or cause additional stress?                                                                                                                                                 |
| Ethical consequences                | What are your thoughts on having patients (or their family) completing the MST, which is usually done by nurses?                                                                                                                                                                                                      | Do you see any problems with having patients complete tasks such as this while in hospital?                                                                                                                                 |
