# Supplementary material for: Patient-Led, Technology-Assisted Malnutrition Risk Screening in Hospital: A Feasibility Study
Source: MDPI journal article supplement (doi:10.3390/nu16081139), 2024-04-12
Supplement: s1 [file s1]

## Supplementary File S1: Patient satisfaction survey

**Instructions:** These questions are about your experience with completing the nutrition screening survey on your bedside TV. Please read each question carefully and circle the answer that best suits. When finished, please check you've answered all questions.

**Q1. What was your overall experience with completing the nutrition screen?**

|               |          |         |          |               |
|---------------|----------|---------|----------|---------------|
| Very negative | Negative | Neutral | Positive | Very positive |
|---------------|----------|---------|----------|---------------|

**Q2. How easy or difficult were the instructions to follow (on the screen)?**

|                |           |         |      |           |
|----------------|-----------|---------|------|-----------|
| Very difficult | Difficult | Neutral | Easy | Very easy |
|----------------|-----------|---------|------|-----------|

**Q3. How satisfied are you with the explanations and/or assistance provided by research personnel in completing this task?**

|                   |              |         |           |                |
|-------------------|--------------|---------|-----------|----------------|
| Very dissatisfied | Dissatisfied | Neutral | Satisfied | Very satisfied |
|-------------------|--------------|---------|-----------|----------------|

**Q4. How burdensome was it to complete this task?**

|                 |                     |         |                 |                  |
|-----------------|---------------------|---------|-----------------|------------------|
| Very burdensome | Somewhat burdensome | Neutral | Not much burden | No burden at all |
|-----------------|---------------------|---------|-----------------|------------------|

**Comments** (optional response) \_\_\_\_\_

---

---

---

---

---
