# Supplementary material for: Patient-Led, Technology-Assisted Malnutrition Risk Screening in Hospital: A Feasibility Study
Source: Nutrients. 2024 Apr 12;16(8):1139. doi: 10.3390/nu16081139 (PMC11055004; doi:10.3390/nu16081139)
Supplement: Supplementary file 1 [file nutrients-16-01139-s001.zip]

Archive with 4 entries (4 files):
- Supplementary Figure S1.pdf
- Supplementary Figure S2.pdf
- Supplementary File S1 - Patient satisfaction survey.pdf
- Supplementary File S2 - patient interview guide.pdf
