# Supplementary figures and images for: Patient-Led, Technology-Assisted Malnutrition Risk Screening in Hospital: A Feasibility Study
Source: MDPI journal article supplement (doi:10.3390/nu16081139), 2024-04-12

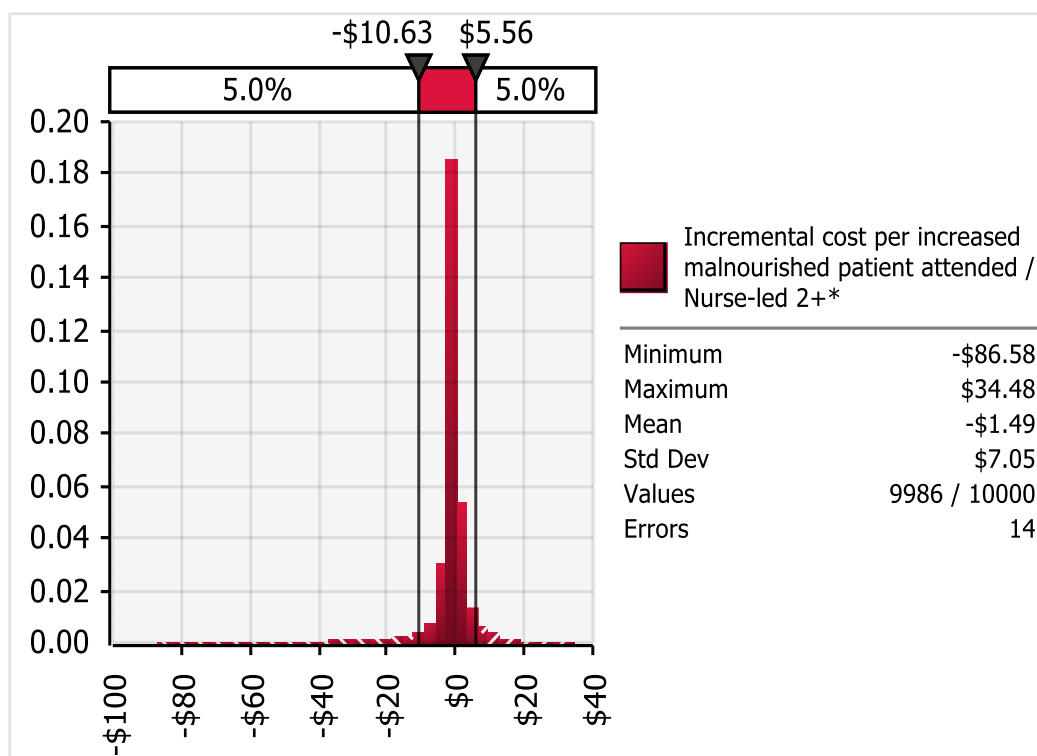

**Supplementary Figure S2:** Incremental cost per patient seen according to nurse-led MST  $\geq 2$

Supplement: s1 [file s1]

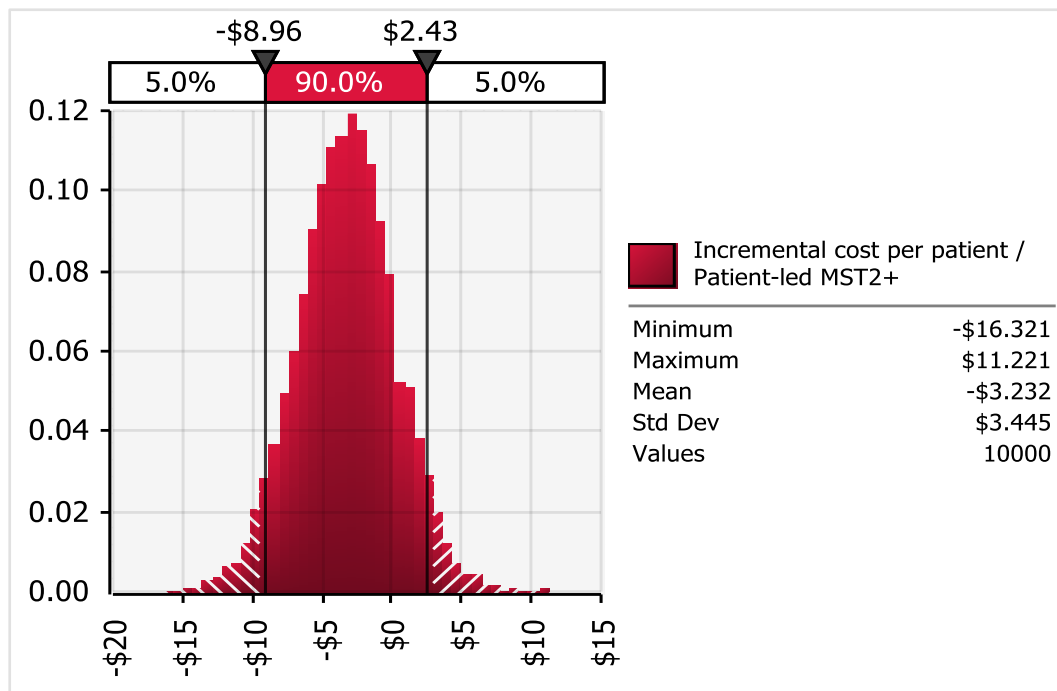

**Supplementary Figure S1:** Incremental cost per patient seen according to patient-led e-MST  
 $\geq 2$

Supplement: s1 [file s1]
